# Supplementary material for: BADERI: an online database to coordinate handsearching activities of controlled clinical trials for their potential inclusion in systematic reviews
Source: PubMed Central journal article supplement (PMC5470310; doi:10.1186/s13063-017-2023-3), 2017-06-13

# Additional file 1: BADERI Subections

<http://baderi.com/login.php>

## Welcome page

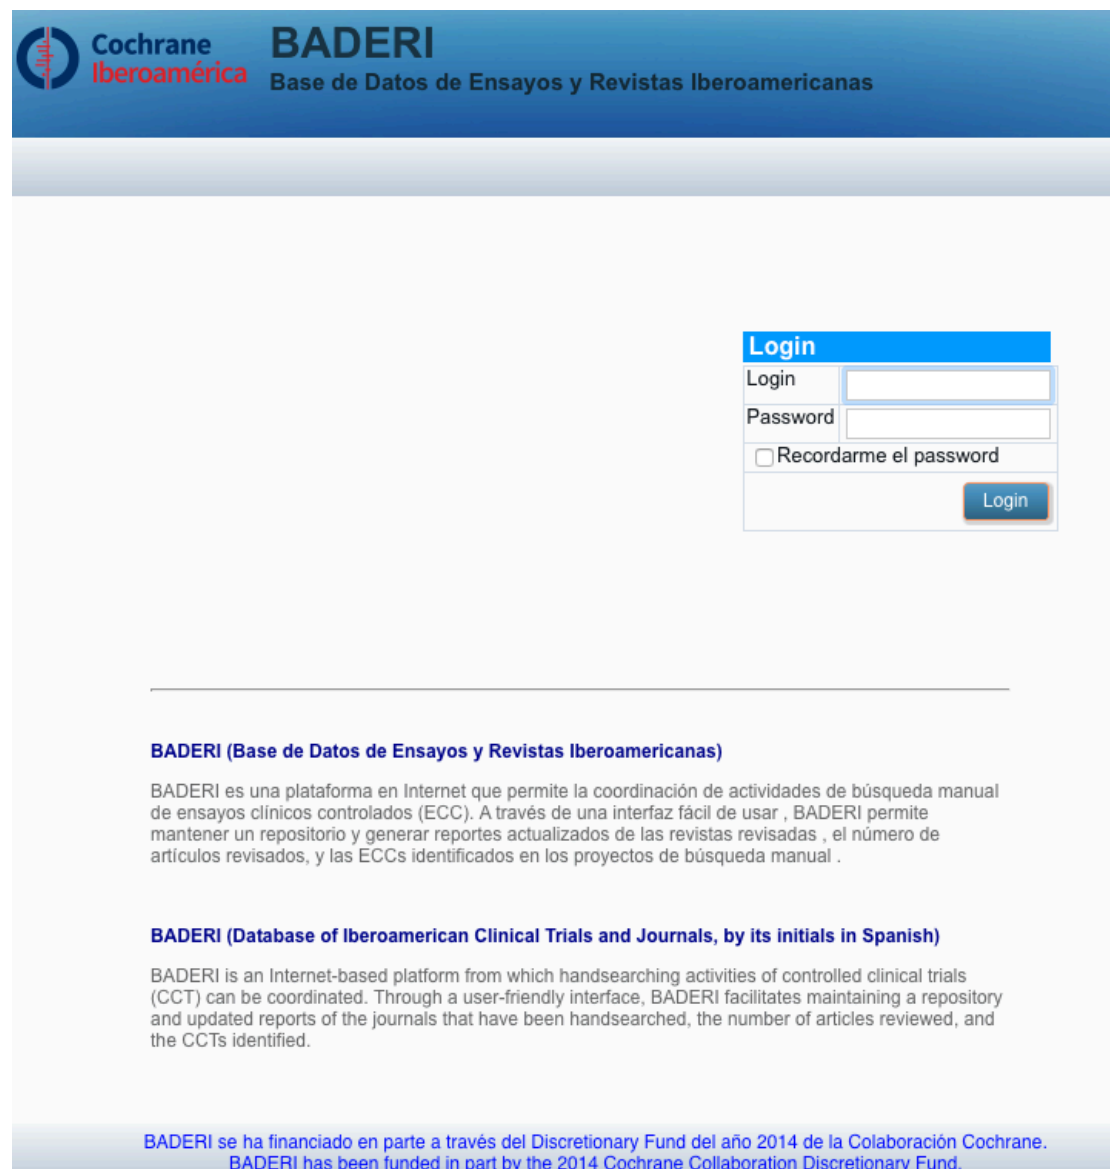

**Cochrane Iberoamérica** **BADERI**  
Base de Datos de Ensayos y Revistas Iberoamericanas

**Login**

Login

Password

Recordarme el password

Login

---

**BADERI (Base de Datos de Ensayos y Revistas Iberoamericanas)**

BADERI es una plataforma en Internet que permite la coordinación de actividades de búsqueda manual de ensayos clínicos controlados (ECC). A través de una interfaz fácil de usar , BADERI permite mantener un repositorio y generar reportes actualizados de las revistas revisadas , el número de artículos revisados, y las ECCs identificados en los proyectos de búsqueda manual .

**BADERI (Database of Iberoamerican Clinical Trials and Journals, by its initials in Spanish)**

BADERI is an Internet-based platform from which handsearching activities of controlled clinical trials (CCT) can be coordinated. Through a user-friendly interface, BADERI facilitates maintaining a repository and updated reports of the journals that have been handsearched, the number of articles reviewed, and the CCTs identified.

BADERI se ha financiado en parte a través del Discretionary Fund del año 2014 de la Colaboración Cochrane.  
BADERI has been funded in part by the 2014 Cochrane Collaboration Discretionary Fund.

## Administration tab

**BADERI**  
Base de Datos de Ensayos y Revistas Iberoamericanas

Administrador    Gestionar    Exportaciones    Consulta    Logout

- Países
- Especialidades
- Usuarios

**Cochrane Iberoamérica** **BADERI**  
Base de Datos de Ensayos y Revistas Iberoamericanas

Administrador    Gestionar    Exportaciones    Consulta    Logout

- Países
- Especialidades
- Usuarios

**Buscar**

PAIS NOMBRE

**Lista de Países**

No. Registros: 25

| PAIS ID             | PAIS NOMBRE          |
|---------------------|----------------------|
| <a href="#">ARG</a> | Argentina            |
| <a href="#">BOL</a> | Bolivia              |
| <a href="#">BRA</a> | Brasil               |
| <a href="#">CHL</a> | Chile                |
| <a href="#">COL</a> | Colombia             |
| <a href="#">CRI</a> | Costa Rica           |
| <a href="#">CUB</a> | Cuba                 |
| <a href="#">DOM</a> | República Dominicana |
| <a href="#">ECU</a> | Ecuador              |
| <a href="#">ESP</a> | España               |

Registro por página    1 de 3

**Editar Pais**

PAIS ID

PAIS NOMBRE

## References tab

# BADERI

## Base de Datos de Ensayos y Revistas Iberoamericanas

Administrador
Gestionar
Exportaciones
Consulta
Logout

Revistas

Artículos no publicados

# BADERI

## Base de Datos de Ensayos y Revistas Iberoamericanas

Administrador
Gestionar
Exportaciones
Consulta
Logout

Listado de Revistas

**Buscar**

|              |                                                |
|--------------|------------------------------------------------|
| ESPECIALIDAD | <input type="text" value="Seleccionar Valor"/> |
| PAIS         | <input type="text" value="Seleccionar Valor"/> |
| TITULO       | <input type="text"/>                           |
| Limpia       | <input type="button" value="Buscar"/>          |

Lista de Revistas

Nueva Revista

| Edit.                | ISSN      | TITULO                                                                                                                                                          | ESPECIALIDAD             | PAIS        | Act.                                | Num. |
|----------------------|-----------|-----------------------------------------------------------------------------------------------------------------------------------------------------------------|--------------------------|-------------|-------------------------------------|------|
|                      | 0300-9033 | Acta Gastroenterológica Latinoamericana                                                                                                                         | Gastroenterología        | Argentina   | <input checked="" type="checkbox"/> |      |
|                      | 0716-0186 | Archivos Chilenos de Oftalmología.                                                                                                                              | Oftalmología<br>Anatomía | Chile       | <input checked="" type="checkbox"/> |      |
|                      | 1657-320X | Archivos de Medicina                                                                                                                                            | Medicina General         | Colombia    | <input type="checkbox"/>            |      |
|                      | 1017-8546 | Revista Médica del Hospital Nacional de Niños Dr. Carlos Sáenz Herrera                                                                                          | Pediatría                | Costa Rica  | <input type="checkbox"/>            |      |
|                      | 0034-7507 | Revista Cubana de Estomatología                                                                                                                                 | Odontología              | Cuba        | <input type="checkbox"/>            |      |
|                      | 1019-8105 | Actas Médicas                                                                                                                                                   | Medicina General         | Ecuador     | <input type="checkbox"/>            |      |
|                      | 0010-0641 | Archivos del Colegio Médico                                                                                                                                     | Medicina General         | El Salvador | <input type="checkbox"/>            |      |
|                      | 0567-7114 | Acofar                                                                                                                                                          | Farmacología             | España      | <input type="checkbox"/>            |      |
|                      | 1137-2834 | Revista de la Facultad de Medicina Universidad Francisco Marroquín, Fundación Chusita Llerandi de Herrera                                                       | Medicina General         | Guatemala   | <input type="checkbox"/>            |      |
|                      | 1998-7307 | Revista Honduras Pediátrica                                                                                                                                     | Pediatría                | Honduras    | <input type="checkbox"/>            |      |
| Total Revistas: 1309 |           | Registro por página <input type="text" value="10"/> <span style="margin-left: 10px;"> <input type="button" value="◀"/> <input type="button" value="▶"/> </span> |                          |             |                                     |      |

**BADERI reports by journal, issue numbers, references to articles, overall report, and articles not published in any journal**

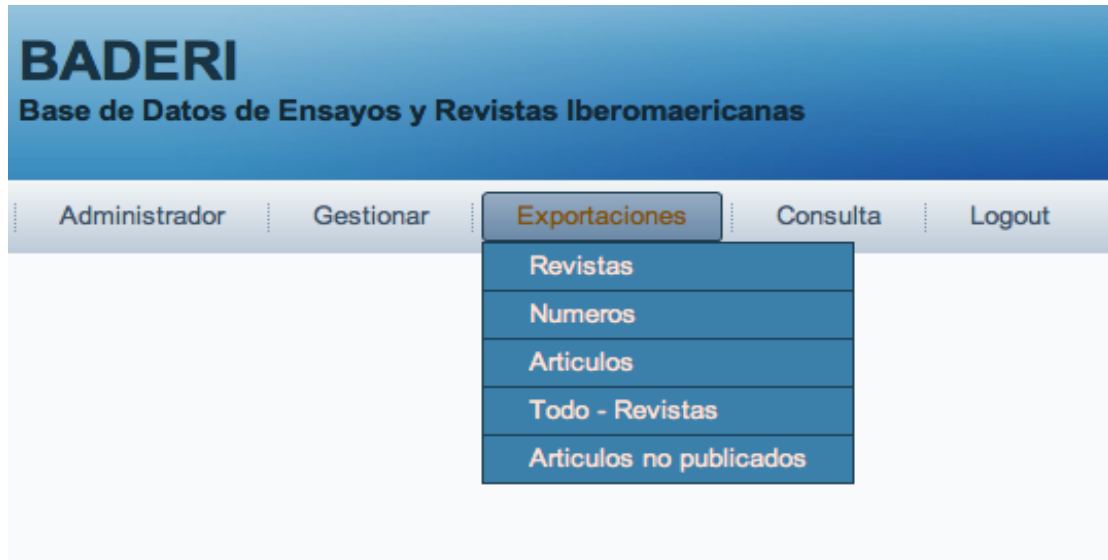

**Search engine of controlled clinical trials by free text**

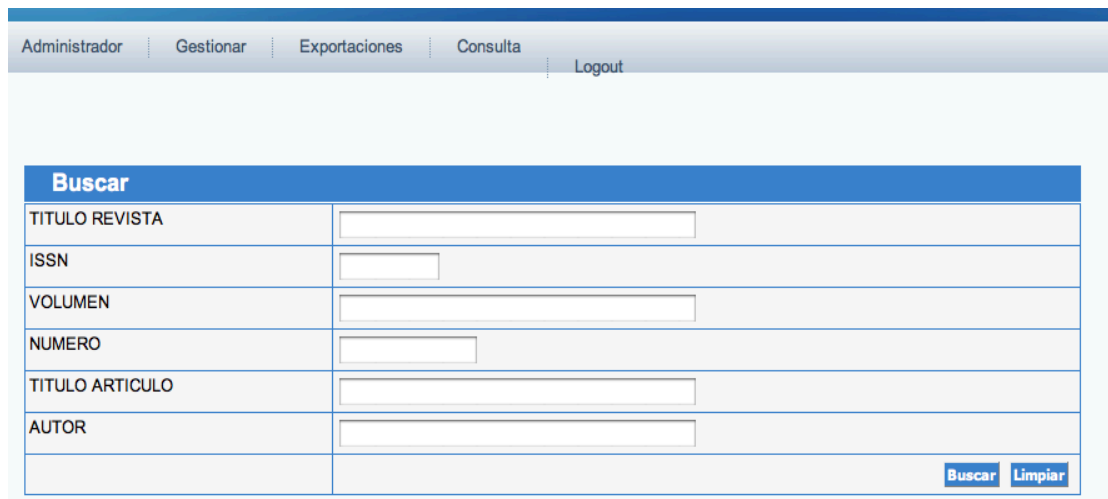

Supplement: 13063_2017_2023_MOESM1_ESM.pdf [file 13063_2017_2023_MOESM1_ESM.pdf]
